# Supplementary material for: Comparative Chloroplast Genomes ofSorghumSpecies: Sequence Divergence and Phylogenetic Relationships
Source: Hindawi journal article supplement (doi:10.1155/2019/5046958), 2019-03-19

Figure S1. Phylogenetic relationships of the Andropogoneae species constructed from the complete chloroplast genome sequences using Bayesian inference (BI).

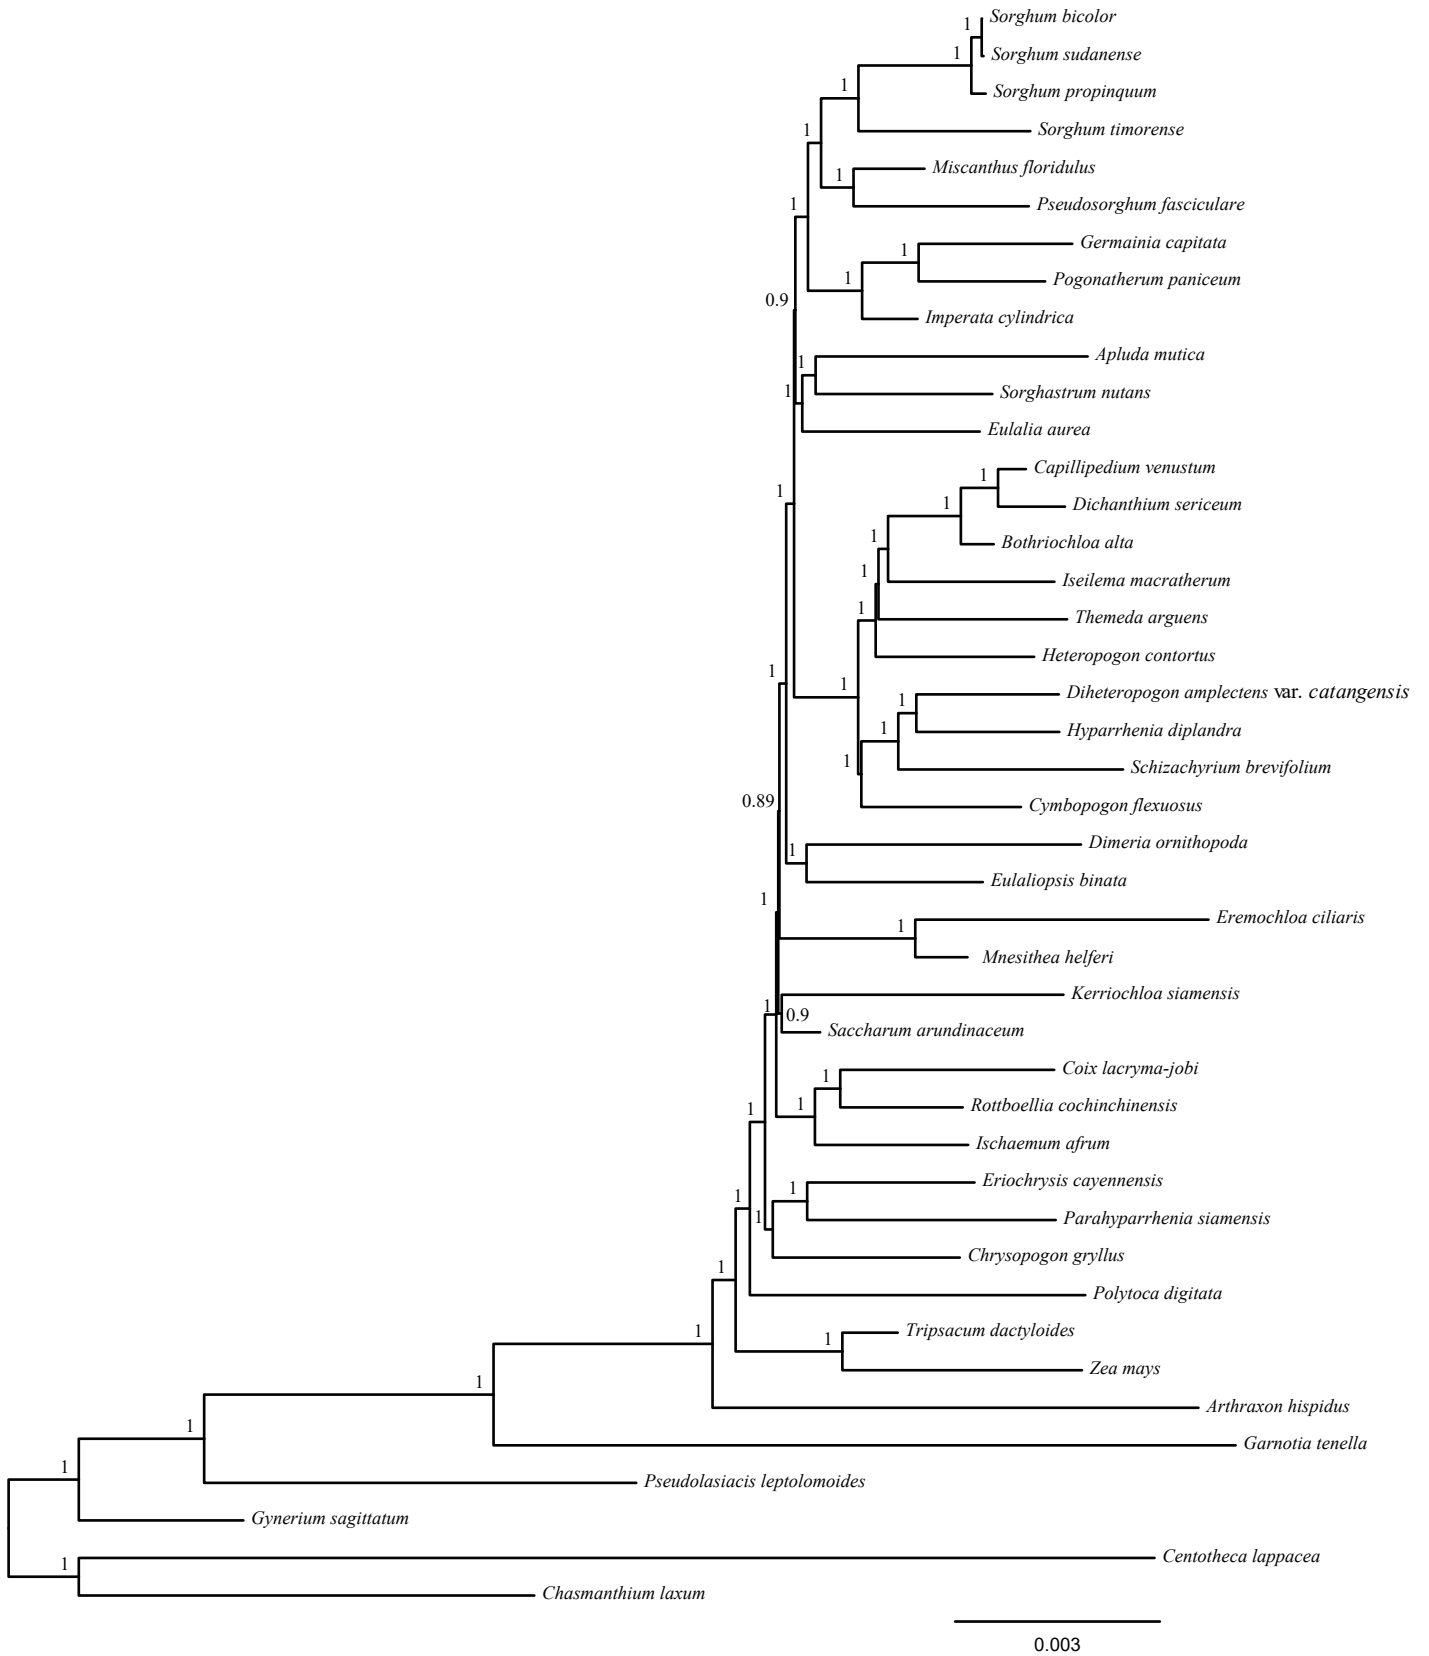

Supplement: f6 [file 5046958.f6.pdf]
