# Supplementary material for: Comparative Chloroplast Genomes of Sorghum Species: Sequence Divergence and Phylogenetic Relationships
Source: Biomed Res Int. 2019 Mar 19;2019:5046958. doi: 10.1155/2019/5046958 (PMC6444266; doi:10.1155/2019/5046958)
Supplement: Supplementary 1 — Table S1: accession numbers and relevant references of the sampled Andropogonodae chloroplast genome sequences obtained from GenBank in this study. [file 5046958.f1.xlsx]

## Sheet: 42 documents from phylogeny
Organism	Accession	%GC	Sequence Length	Tribe
Apluda mutica	KY432813	0.384	140299	Andropogonodae
Chrysopogon gryllus	KY596161	0.384	140034	Andropogonodae
Eriochrysis cayennensis	KU961861	0.384	140380	Andropogonodae
Imperata cylindrica	KU291466	0.385	140831	Andropogonodae
Pogonatherum paniceum	KU961859	0.384	139205	Andropogonodae
Diheteropogon amplectens var. catangensis	KU291497	0.385	139700	Andropogonodae
Hyparrhenia diplandra	KY596163	0.385	139175	Andropogonodae
Schizachyrium brevifolium	KY596122	0.386	138027	Andropogonodae
Bothriochloa alta	KU291492	0.386	137645	Andropogonodae
Capillipedium venustum	KU291493	0.385	138257	Andropogonodae
Cymbopogon flexuosus	KY596169	0.385	139715	Andropogonodae
Dichanthium sericeum	KY596128	0.385	138271	Andropogonodae
Heteropogon contortus	KY596145	0.384	134982	Andropogonodae
Iseilema macratherum	KU291468	0.385	139643	Andropogonodae
Parahyparrhenia siamensis	KY596155	0.384	140355	Andropogonodae
Themeda arguens	KY596129	0.386	138827	Andropogonodae
Arthraxon hispidus	KY596179	0.383	140507	Andropogonodae
Polytoca digitata	KY596173	0.384	140892	Andropogonodae
Coix lacryma-jobi	FJ261955	0.385	140745	Andropogonodae
Dimeria ornithopoda	KY596130	0.384	140629	Andropogonodae
Germainia capitata	KY596175	0.385	139817	Andropogonodae
Ischaemum afrum	KU291467	0.384	141097	Andropogonodae
Kerriochloa siamensis	KY596117	0.383	138335	Andropogonodae
Eremochloa ciliaris	KY596146	0.383	138970	Andropogonodae
Mnesithea helferi	KY596162	0.384	140801	Andropogonodae
Rottboellia cochinchinensis	KU291481	0.384	140336	Andropogonodae
Eulalia aurea	KU291499	0.385	140220	Andropogonodae
Eulaliopsis binata	KY596182	0.384	141091	Andropogonodae
Miscanthus floridulus	LN869215	0.384	141356	Andropogonodae
Pseudosorghum fasciculare	KY596139	0.384	140474	Andropogonodae
Saccharum arundinaceum	LC160130	0.384	141210	Andropogonodae
Sorghastrum nutans	KU291482	0.384	141061	Andropogonodae
Sorghum bicolor	EF115542	0.385	140754	Andropogonodae
Sorghum timorense	KF998272	0.385	140629	Andropogonodae
Tripsacum dactyloides	MG386499	0.384	141050	Andropogonodae
Zea mays	X86563	0.385	140384	Andropogonodae
Garnotia tenella	KY596184	0.384	139629	Arundinelleae
Centotheca lappacea	KJ920225	0.386	139464	Centotheceae
Chasmanthium laxum	MF035973	0.387	141203	Chasmanthieae
Gynerium sagittatum	KY432779	0.388	140453	Gynerieae
Pseudolasiacis leptolomoides	MF563372	0.386	140480	Panicodae
