# Supplementary material for: Comparative Chloroplast Genomes of Sorghum Species: Sequence Divergence and Phylogenetic Relationships
Source: Biomed Res Int. 2019 Mar 19;2019:5046958. doi: 10.1155/2019/5046958 (PMC6444266; doi:10.1155/2019/5046958)
Supplement: Supplementary 2 — Table S2: list of genes present in the Sorghum chloroplast genome. [file 5046958.f2.xlsx]

## Sheet: Sheet1
Table S2 List of genes found in the Sorghum chloroplast genome.
Category for genes	Group of gene	Name of gene
Photosynthesis related genes	Rubisco	rbcL
	Photosystem Ⅰ	psaA,psaB,psaC,psaI,psaJ
	Assembly/stability of photosystem Ⅰ	*ycf3,ycf4
	Photosystem Ⅱ	psbA,psbB,psbC,psbD,psbE,psbF,psbH,psbI,psbJ,psbK,psbL,psbM,psbN,psbT,psbZ
	ATP synthase	atpA, atpB, atpE, *atpF, atpH, atpI
	cytochrome b/f compelx	petA, *petB, *petD, petG, petL, petN
	cytochrome c synthesis	ccsA
	NADPH dehydrogenase	*ndhA, *ndhB, ndhC, ndhD, ndhE, ndhF ,ndhG, ndhH, ndhI, ndhJ, ndhK
Transcription and translation related genes	transcription	rpoA, rpoB, *rpoC1, rpoC2
	ribosomal proteins	rps2, rps3, rps4, rps7, rps8, rps11, *rps12, rps14,rps15, *rps16, rps18, rps19,*rpl2, rpl14, *rpl16, rpl20, rpl22, rpl23, rpl32, rpl33,rpl36
	translation initiation factor	infA
RNA genes	ribosomal RNA	rrn5, rrn4.5, rrn16, rrn23
	transfer RNA	*trnAUGC, trnCGCA, trnDGUC, trnEUUC, trnFGAA,trnGGCC, *trnGUCC, trnHGUG, trnICAU, *trnIGAU,*trnKUUU, trnLCAA, *trnLUAA, trnLUAG, trnfMCAUI,trnMCAU, trnNGUU, trnPUGG, trnQUUG,trnRACG, trnRUCU, trnSGCU, trnSGGA, trnSUGA, trnTGGU,trnTUGU, trnVGAC, *trnVUAC, trnWCCA, trnYGUA
Other genes	RNA processing	matK
	carbon metabolism	cemA
	proteolysis	*clpP
Intron-containing genes are marked by asterisks (*).
