# Supplementary material for: Comparative Chloroplast Genomes of Sorghum Species: Sequence Divergence and Phylogenetic Relationships
Source: Biomed Res Int. 2019 Mar 19;2019:5046958. doi: 10.1155/2019/5046958 (PMC6444266; doi:10.1155/2019/5046958)
Supplement: Supplementary 3 — Table S3: SSR loci identified in the four Sorghum chloroplast genomes. Positions, locations, types, and polymorphisms are shown. [file 5046958.f3.xlsx]

## Sheet: Sheet1
No.	Name	Region	Position	Loction	SSR type	SSR type
1	S. propinquum	LSC	trnK-matK	spacer	T(10)	T
2	S. propinquum	LSC	trnK-matK	spacer	A(10)	A
3	S. propinquum	LSC	rps16-trnQ	spacer	T(10)	T
4	S. propinquum	LSC	psbK-psbI	spacer	A(11)	A
5	S. propinquum	LSC	psbC	exon	G(10)	G
6	S. propinquum	LSC	trnG-trnM	spacer	A(11)	A
7	S. propinquum	LSC	trnT-trnE	spacer	T(12)	T
8	S. propinquum	LSC	trnD-psbM	spacer	G(13)	G
9	S. propinquum	LSC	trnD-psbM	spacer	T(11)	T
10	S. propinquum	LSC	trnD-psbM	spacer	A(11)	A
11	S. propinquum	LSC	psbM-petN	spacer	A(13)	A
12	S. propinquum	LSC	trnC-rpoB	spacer	C(14)	C
13	S. propinquum	LSC	rpoC2	exon	AT(5)	AT
14	S. propinquum	LSC	rpoC2	exon	A(11)	A
15	S. propinquum	LSC	atpI-atpH	spacer	T(12)	T
16	S. propinquum	LSC	trnR-trnfM	spacer	TTA(4)	TTA
17	S. propinquum	LSC	ycf3 intron	intron	TCCT(3)	TCCT
18	S. propinquum	LSC	trnL-trnF	spacer	T(11)	T
19	S. propinquum	LSC	ndhK-ndhC	spacer	T(14)	T
20	S. propinquum	LSC	ndhC-trnV	spacer	CT(5)	CT
21	S. propinquum	LSC	trnM-atpE	spacer	GTAG(4)	GTAG
22	S. propinquum	LSC	atpB-rbcL	spacer	A(10)	A
23	S. propinquum	LSC	atpB-rbcL	spacer	T(10)	T
24	S. propinquum	LSC	psbE-petL	spacer	T(11)	T
25	S. propinquum	LSC	psbE-petL	spacer	T(10)	T
26	S. propinquum	LSC	petG-trnW	spacer	T(11)	T
27	S. propinquum	LSC	trnP-psaJ	spacer	TA(5)	TA
28	S. propinquum	LSC	rpl33-rps18	spacer	T(11)	T
29	S. propinquum	LSC	clpP-psbB	spacer	AGAA(3)	AGAA
30	S. propinquum	LSC	rpoA-rps11	spacer	T(10)	T
31	S. propinquum	LSC	infA-rps8	spacer	T(10)	T
32	S. propinquum	LSC	infA-rps8	spacer	T(10)	T
33	S. propinquum	LSC	rpl22	exon	CTT(4)	CTT
34	S. propinquum	IR	trnL-ndhB	spacer	TA(5)	TA
35	S. propinquum	IR	ndhB-rps7	spacer	T(10)	T
36	S. propinquum	IR	trnI intron	intron	G(10)	G
37	S. propinquum	IR	rrrn4.5-rrn5	spacer	AACG(3)	AACG
38	S. propinquum	SSC	rpl32-trnL	spacer	ATTG(3)	ATTG
39	S. propinquum	SSC	ndhD	exon	AATA(3)	AATA
40	S. propinquum	SSC	ndhH	exon	ATCC(3)	ATCC
41	S. propinquum	SSC	ndhH	exon	TC(5)	TC
42	S. propinquum	IR	rrrn4.5-rrn6	spacer	TCGT(3)	TCGT
43	S. propinquum	IR	trnI intron	intron	C(10)	C
44	S. propinquum	IR	ndhB-rps7	spacer	A(10)	A
45	S. propinquum	IR	trnL-ndhB	spacer	TA(5)	TA
1	S. sudanense	LSC	trnK-matK	spacer	T(10)	T
2	S. sudanense	LSC	rps16-trnQ	spacer	T(11)	T
3	S. sudanense	LSC	psbK-psbI	spacer	A(11)	A
4	S. sudanense	LSC	psbC	exon	G(10)	G
5	S. sudanense	LSC	trnG-trnM	spacer	A(10)	A
6	S. sudanense	LSC	trnT-trnE	spacer	T(12)	T
7	S. sudanense	LSC	trnD-psbM	spacer	G(10)	G
8	S. sudanense	LSC	trnD-psbM	spacer	A(11)	A
9	S. sudanense	LSC	psbM-petN	spacer	A(14)	A
10	S. sudanense	LSC	trnC-rpoB	spacer	C(13)	C
11	S. sudanense	LSC	rpoC2	exon	AT(5)	AT
12	S. sudanense	LSC	rpoC2	exon	A(11)	A
13	S. sudanense	LSC	atpI-atpH	spacer	T(10)	T
14	S. sudanense	LSC	atpF intron	intron	ATTAGT(3)	ATTAGT
15	S. sudanense	LSC	trnR-trnfM	spacer	TTA(4)	TTA
16	S. sudanense	LSC	ycf3 intron	intron	TCCT(3)	TCCT
17	S. sudanense	LSC	trnL-trnF	spacer	T(10)	T
18	S. sudanense	LSC	ndhK-ndhC	spacer	T(14)	T
19	S. sudanense	LSC	ndhC-trnV	spacer	CT(5)	CT
20	S. sudanense	LSC	trnM-atpE	spacer	GTAG(4)	GTAG
21	S. sudanense	LSC	petG-trnW	spacer	T(10)	T
22	S. sudanense	LSC	trnP-psaJ	spacer	TA(5)	TA
23	S. sudanense	LSC	rpl33-rps18	spacer	T(11)	T
24	S. sudanense	LSC	clpP-psbB	spacer	AGAA(3)	AGAA
25	S. sudanense	LSC	rpoA-rps11	spacer	T(10)	T
26	S. sudanense	LSC	infA-rps8	spacer	T(10)	T
27	S. sudanense	LSC	infA-rps8	spacer	T(10)	T
28	S. sudanense	LSC	rpl16 intron	intron	T(13)	T
29	S. sudanense	LSC	rpl22	exon	CTT(4)	CTT
30	S. sudanense	IR	trnL-ndhB	spacer	TA(5)	TA
31	S. sudanense	IR	ndhB-rps7	spacer	T(11)	T
32	S. sudanense	IR	trnI intron	intron	G(10)	G
33	S. sudanense	IR	rrrn4.5-rrn5	spacer	AACG(3)	AACG
34	S. sudanense	SSC	rpl32-trnL	spacer	ATTG(3)	ATTG
35	S. sudanense	SSC	ndhD	exon	AATA(3)	AATA
36	S. sudanense	SSC	ndhH	exon	ATCC(3)	ATCC
37	S. sudanense	SSC	ndhH	exon	TC(5)	TC
38	S. sudanense	IR	rrrn4.5-rrn5	spacer	TCGT(3)	TCGT
39	S. sudanense	IR	trnI intron	intron	C(10)	C
40	S. sudanense	IR	ndhB-rps7	spacer	A(11)	A
41	S. sudanense	IR	trnL-ndhB	spacer	TA(5)	TA
1	S. bicolor	LSC	trnK-matK	spacer	T(10)	T
2	S. bicolor	LSC	rps16-trnQ	spacer	T(11)	T
3	S. bicolor	LSC	psbK-psbI	spacer	A(11)	A
4	S. bicolor	LSC	psbC	exon	G(10)	G
5	S. bicolor	LSC	trnG-trnM	spacer	A(10)	A
6	S. bicolor	LSC	trnT-trnE	spacer	T(12)	T
7	S. bicolor	LSC	trnD-psbM	spacer	G(10)	G
8	S. bicolor	LSC	trnD-psbM	spacer	A(11)	A
9	S. bicolor	LSC	psbM-petN	spacer	A(14)	A
10	S. bicolor	LSC	trnC-rpoB	spacer	C(13)	C
11	S. bicolor	LSC	rpoC2	exon	AT(5)	AT
12	S. bicolor	LSC	rpoC2	exon	A(11)	A
13	S. bicolor	LSC	atpI-atpH	spacer	T(10)	T
14	S. bicolor	LSC	atpF intron	intron	ATTAGT(3)	ATTAGT
15	S. bicolor	LSC	trnR-trnfM	spacer	TTA(4)	TTA
16	S. bicolor	LSC	ycf3 intron	intron	TCCT(3)	TCCT
17	S. bicolor	LSC	trnL-trnF	spacer	T(10)	T
18	S. bicolor	LSC	ndhK-ndhC	spacer	T(14)	T
19	S. bicolor	LSC	ndhC-trnV	spacer	CT(5)	CT
20	S. bicolor	LSC	trnM-atpE	spacer	GTAG(4)	GTAG
21	S. bicolor	LSC	petG-trnW	spacer	T(10)	T
22	S. bicolor	LSC	trnP-psaJ	spacer	TA(5)	TA
23	S. bicolor	LSC	rpl33-rps18	spacer	T(11)	T
24	S. bicolor	LSC	clpP-psbB	spacer	AGAA(3)	AGAA
25	S. bicolor	LSC	rpoA-rps11	spacer	T(10)	T
26	S. bicolor	LSC	infA-rps8	spacer	T(10)	T
27	S. bicolor	LSC	infA-rps8	spacer	T(10)	T
28	S. bicolor	LSC	rpl16 intron	intron	T(14)	T
29	S. bicolor	LSC	rpl22	exon	CTT(4)	CTT
30	S. bicolor	IR	trnL-ndhB	spacer	TA(5)	TA
31	S. bicolor	IR	ndhB-rps7	spacer	T(11)	T
32	S. bicolor	IR	trnI intron	intron	G(10)	G
33	S. bicolor	IR	rrrn4.5-rrn5	spacer	AACG(3)	AACG
34	S. bicolor	SSC	rpl32-trnL	spacer	ATTG(3)	ATTG
35	S. bicolor	SSC	ndhD	exon	AATA(3)	AATA
36	S. bicolor	SSC	ndhH	exon	ATCC(3)	ATCC
37	S. bicolor	SSC	ndhH	exon	TC(5)	TC
38	S. bicolor	IR	rrrn4.5-rrn8	spacer	TCGT(3)	TCGT
39	S. bicolor	IR	trnI intron	intron	C(10)	C
40	S. bicolor	IR	ndhB-rps7	spacer	A(11)	A
41	S. bicolor	IR	trnL-ndhB	spacer	TA(5)	TA
1	S. timorense	LSC	trnkK-rps16	spacer	A(11)	A
2	S. timorense	LSC	rps16-trnQ	spacer	T(10)	T
3	S. timorense	LSC	psbK-psbI	spacer	A(10)	A
4	S. timorense	LSC	psbC	exon	G(10)	G
5	S. timorense	LSC	psbZ-trnG	spacer	A(11)	A
6	S. timorense	LSC	trnT-trnE	spacer	T(11)	T
7	S. timorense	LSC	trnT-trnE	spacer	A(10)	A
8	S. timorense	LSC	trnD-psbM	spacer	G(10)	G
9	S. timorense	LSC	trnC-rpoB	spacer	T(10)	T
10	S. timorense	LSC	rpoC2	exon	AT(5)	AT
11	S. timorense	LSC	rpoC2	exon	A(10)	A
12	S. timorense	LSC	atpI-atpH	spacer	T(10)	T
13	S. timorense	LSC	psaA-ycf3	spacer	T(11)	T
14	S. timorense	LSC	ycf3 intron	intron	TCCT(3)	TCCT
15	S. timorense	LSC	trnT-trnL	spacer	T(10)	T
16	S. timorense	LSC	ndhK-ndhC	spacer	T(14)	T
17	S. timorense	LSC	ndhC-trnV	spacer	CT(5)	CT
18	S. timorense	LSC	trnM-atpE	spacer	GTAG(4)	GTAG
19	S. timorense	LSC	rbcL-rpl23	spacer	A(10)	A
20	S. timorense	LSC	psaI-ycf4	spacer	T(10)	T
21	S. timorense	LSC	trnP-psaJ	spacer	TA(5)	TA
22	S. timorense	LSC	clpP-psbB	spacer	AGAA(3)	AGAA
23	S. timorense	LSC	rpoA-rps11	spacer	T(10)	T
24	S. timorense	LSC	infA-rps8	spacer	T(10)	T
25	S. timorense	LSC	infA-rps8	spacer	T(12)	T
26	S. timorense	LSC	rpl16 intron	intron	T(14)	T
27	S. timorense	LSC	rpl22	exon	CTT(4)	CTT
28	S. timorense	IR	trnL-ndhB	spacer	TA(5)	TA
29	S. timorense	IR	trnI intron	intron	G(11)	G
30	S. timorense	IR	rrrn4.5-rrn5	spacer	AACG(3)	AACG
31	S. timorense	SSC	rpl32-trnL	spacer	A(11)	A
32	S. timorense	SSC	rpl32-trnL	spacer	ATTG(3)	ATTG
33	S. timorense	SSC	rpl32-trnL	spacer	T(12)	T
34	S. timorense	SSC	ndhD	exon	AATA(3)	AATA
35	S. timorense	SSC	ndhH	exon	ATCC(3)	ATCC
36	S. timorense	SSC	ndhH	exon	TC(5)	TC
37	S. timorense	IR	rrrn4.5-rrn7	spacer	TCGT(3)	TCGT
38	S. timorense	IR	trnI intron	intron	G(11)	G
39	S. timorense	IR	trnL-ndhB	spacer	TA(5)	TA
