# Supplementary material for: Comparative Chloroplast Genomes of Sorghum Species: Sequence Divergence and Phylogenetic Relationships
Source: Biomed Res Int. 2019 Mar 19;2019:5046958. doi: 10.1155/2019/5046958 (PMC6444266; doi:10.1155/2019/5046958)
Supplement: Supplementary 4 — Table S4: polymorphic SSR-indels identified in the analyzed material. For each species, the number of repeats for each SSR is provided. [file 5046958.f4.xlsx]

## Sheet: Sheet1
	Position	Region	Locatin	SSR type	S. sudanense	S. propinquum	S. bicolor	S. timorense
1	matK-trnK	LSC	spacer	T	9	10	10	9
2	matK-trnK	LSC	spacer	T	10	9	9	7
3	matK-trnK	LSC	spacer	A	10	9	9	8
4	trnK-rps16	LSC	spacer	A	9	9	9	11
5	rps16 intron	LSC	intron	C	8	8	8	7
6	rps16-trnQ	LSC	spacer	T	10	11	11	10
7	trnG-trnM	LSC	spacer	A	9	9	9	8
8	trnG-trnM	LSC	spacer	A	10	10	10	9
9	trnT-trnE	LSC	spacer	T	12	12	12	11
10	trnT-trnE	LSC	spacer	A	9	9	9	10
11	trnD-psbM	LSC	spacer	T	11	9	9	9
12	trnD-psbM	LSC	spacer	A	11	11	11	8
13	psbM-petN	LSC	spacer	A	13	14	14	9
14	trnC-rpoB	LSC	spacer	T	9	9	9	10
15	trnC-rpoB	LSC	spacer	C	14	13	13	8
16	rpoC2-rps2	LSC	spacer	T	9	9	9	8
17	atpI-atpH	LSC	spacer	T	8	8	8	9
18	atpI-atpH	LSC	spacer	T	12	10	10	10
19	atpF intron	LSC	intron	A	8	9	9	9
20	atpF intron	LSC	intron	A	8	8	8	7
21	atpF-atpA	LSC	spacer	A	7	7	7	10
22	ycf3 intron	LSC	intron	T	7	7	7	8
23	trnT-trnL	LSC	spacer	A	8	8	8	9
24	trnT-trnL	LSC	spacer	T	8	8	8	10
25	trnL-trnF	LSC	spacer	T	11	10	10	9
26	atpB-rbcL	LSC	spacer	A	10	8	8	8
27	atpB-rbcL	LSC	spacer	T	10	9	9	9
28	atpB-rbcL	LSC	spacer	T	9	9	9	8
29	psaI-ycf4	LSC	spacer	T	9	9	9	10
30	trnW-trnP	LSC	spacer	T	11	9	9	9
31	trnW-trnP	LSC	spacer	T	10	9	9	8
32	trnW-trnP	LSC	spacer	T	11	10	10	9
33	trnW-trnP	LSC	spacer	A	8	9	9	8
34	rps11-rpl36	LSC	spacer	T	9	9	9	8
35	rpl16 intron	LSC	intron	T	7	7	7	9
36	rpl16 intron	LSC	intron	T	10	13	14	14
37	rps3-rpl22	LSC	spacer	T	8	8	8	9
38	ndhB-rps7	IR	spacer	T	10	11	11	8
39	trnI intron	SSC	intron	G	10	10	10	11
40	ndhF-rpl32	SSC	spacer	AT	5	4	4	3
41	rpl32-trnL	SSC	spacer	A	9	9	9	8
42	ndhA intron	SSC	spacer	A	8	8	8	9
43	rps7-ndhB	IR	spacer	A	10	11	11	8
