# Supplementary material for: Comparative Chloroplast Genomes of Sorghum Species: Sequence Divergence and Phylogenetic Relationships
Source: Biomed Res Int. 2019 Mar 19;2019:5046958. doi: 10.1155/2019/5046958 (PMC6444266; doi:10.1155/2019/5046958)
Supplement: Supplementary 5 — Table S5: polymorphic NR-indels identified in the analyzed material. Indel events are reported for each of the four Sorghum species. [file 5046958.f5.xlsx]

## Sheet: Sheet1
	No.	Position	Region	Loction	Length (bp)	S. sudanense	S. propinquum	S. bicolor	S. timorense
	1	trnK-matK	LSC	spacer	1	insertion	insertion	insertion	deletion
	2	trnK-matK	LSC	spacer	21	deletion	deletion	deletion	insertion
	3	trnK-rps16	LSC	spacer	10	deletion	deletion	deletion	insertion
	4	trnK-rps16	LSC	spacer	55	insertion	insertion	insertion	deletion
	5	rps16-trnQ	LSC	spacer	1	deletion	deletion	deletion	insertion
	6	rps16-trnQ	LSC	spacer	4	insertion	insertion	insertion	deletion
	7	rps16-trnQ	LSC	spacer	16	insertion	insertion	insertion	deletion
	8	rps16-trnQ	LSC	spacer	1	deletion	deletion	deletion	insertion
	9	rps16-trnQ	LSC	spacer	152	insertion	insertion	insertion	deletion
	10	psbK-psbI	LSC	spacer	2	insertion	insertion	insertion	deletion
	11	psbK-psbI	LSC	spacer	10	deletion	deletion	deletion	insertion
	12	trnS-psbD	LSC	spacer	22	insertion	insertion	insertion	deletion
	13	trnS-psbZ	LSC	spacer	2	deletion	deletion	deletion	insertion
	14	psbZ-trnG	LSC	spacer	2	deletion	deletion	deletion	insertion
	15	trnG-trnM	LSC	spacer	1	insertion	insertion	insertion	deletion
	16	trnG-trnM	LSC	spacer	5	deletion	deletion	deletion	insertion
	17	trnG-trnM	LSC	spacer	5	deletion	deletion	deletion	insertion
	18	trnG-trnM	LSC	spacer	1	deletion	deletion	deletion	insertion
	19	trnG-trnM	LSC	spacer	6	deletion	deletion	deletion	insertion
	20	trnG-trnM	LSC	spacer	5	insertion	insertion	insertion	deletion
	21	trnT-trnE	LSC	spacer	8	deletion	deletion	deletion	insertion
	22	trnY-trnD	LSC	spacer	1	insertion	insertion	insertion	deletion
	23	trnY-trnD	LSC	spacer	22	deletion	deletion	deletion	insertion
	24	trnD-psbM	LSC	spacer	1	insertion	insertion	insertion	deletion
	25	trnD-psbM	LSC	spacer	1	insertion	insertion	insertion	deletion
	26	trnD-psbM	LSC	spacer	8	insertion	insertion	insertion	deletion
	27	trnD-psbM	LSC	spacer	5	deletion	deletion	deletion	insertion
	28	psbM-petN	LSC	spacer	22	deletion	deletion	deletion	insertion
	29	petN-trnC	LSC	spacer	5	insertion	insertion	insertion	deletion
	30	trnC-rpoB	LSC	spacer	9	insertion	insertion	insertion	deletion
	31	trnC-rpoB	LSC	spacer	2	insertion	insertion	insertion	deletion
	32	trnC-rpoB	LSC	spacer	4	insertion	insertion	insertion	deletion
	33	rpoC1 intron	LSC	intron	2	deletion	insertion	deletion	deletion
	34	rpoC1-rpoC2	LSC	spacer	1	insertion	insertion	insertion	deletion
	35	rpoC2	LSC	exon	165	deletion	insertion	insertion	insertion
	36	rpoC2-rps2	LSC	spacer	28	insertion	deletion	deletion	deletion
	37	atpI-atpH	LSC	spacer	1	insertion	insertion	insertion	deletion
	38	atpI-atpH	LSC	spacer	61	deletion	deletion	deletion	insertion
	39	atpH-atpF	LSC	spacer	1	deletion	deletion	deletion	insertion
	40	atpH-atpF	LSC	spacer	5	deletion	deletion	deletion	insertion
	41	atpF intron	LSC	intron	1	insertion	insertion	insertion	deletion
	42	atpF intron	LSC	intron	6	deletion	insertion	insertion	deletion
	43	ycf3 intron	LSC	intron	8	deletion	deletion	deletion	insertion
	44	ycf3 intron	LSC	intron	4	insertion	insertion	insertion	deletion
	45	ycf3-trnS	LSC	spacer	4	insertion	insertion	insertion	deletion
	46	ycf3-trnS	LSC	spacer	3	deletion	deletion	deletion	insertion
	47	trnT-trnL	LSC	spacer	2	insertion	insertion	insertion	deletion
	48	trnT-trnL	LSC	spacer	1	insertion	insertion	insertion	deletion
	49	trnT-trnL	LSC	spacer	3	deletion	deletion	deletion	insertion
	50	trnL intron	LSC	intron	3	deletion	deletion	deletion	insertion
	51	trnL-trnF	LSC	spacer	4	deletion	deletion	deletion	insertion
	52	trnL-trnF	LSC	spacer	3	deletion	deletion	deletion	insertion
	53	trnF-ndhJ	LSC	spacer	21	insertion	insertion	insertion	deletion
	54	ndhC-trnV	LSC	spacer	15	insertion	insertion	insertion	deletion
	55	trnV-trnM	LSC	spacer	30	insertion	insertion	insertion	deletion
	56	atpB-rbcL	LSC	spacer	15	insertion	insertion	insertion	deletion
	57	psaI-ycf4	LSC	spacer	1	deletion	deletion	deletion	insertion
	58	cemA-petA	LSC	spacer	22	insertion	deletion	deletion	deletion
	59	psbE-petL	LSC	spacer	1	insertion	insertion	insertion	deletion
	60	psbE-petL	LSC	spacer	2	deletion	deletion	deletion	insertion
	61	trnW-trnP	LSC	spacer	7	insertion	insertion	insertion	deletion
	62	psaJ-rpl33	LSC	spacer	1	deletion	deletion	deletion	insertion
	63	clpP-psbB	LSC	spacer	17	deletion	deletion	deletion	insertion
	64	petB intron	LSC	intron	4	insertion	insertion	insertion	deletion
	65	rps11-rpl36	LSC	spacer	1	deletion	deletion	deletion	insertion
	66	rps11-rpl36	LSC	spacer	11	deletion	deletion	deletion	insertion
	67	rpl16 intron	LSC	intron	5	insertion	insertion	insertion	deletion
	68	rpl16 intron	LSC	intron	1	deletion	deletion	deletion	insertion
	69	rpl16 intron	LSC	intron	8	deletion	deletion	deletion	insertion
	70	rpl16 intron	LSC	intron	5	deletion	deletion	deletion	insertion
	71	trnI-trnL	IR	spacer	5	deletion	deletion	deletion	insertion
	72	trnI-trnL	IR	spacer	5	insertion	insertion	insertion	deletion
	73	rps12-trnV	IR	spacer	21	insertion	insertion	insertion	deletion
	74	trnN-rps15	SSC	spacer	6	deletion	deletion	deletion	insertion
	75	trnN-rps15	SSC	spacer	5	deletion	deletion	deletion	insertion
	76	ndhF	SSC	exon	18	deletion	deletion	deletion	insertion
	77	ndhF-rpl32	SSC	spacer	5	deletion	deletion	deletion	insertion
	78	ndhF-rpl32	SSC	spacer	15	deletion	deletion	deletion	insertion
	79	trnL-ccsA	SSC	spacer	1	insertion	deletion	deletion	insertion
	80	ccsA-ndhD	SSC	spacer	1	deletion	deletion	deletion	insertion
	81	psaC-ndhE	SSC	spacer	7	deletion	deletion	deletion	insertion
	82	psaC-ndhE	SSC	spacer	5	insertion	insertion	insertion	deletion
	83	ndhG-ndhI	SSC	spacer	9	insertion	insertion	insertion	deletion
	84	ndhA intron	SSC	intron	2	insertion	insertion	insertion	deletion
	85	ndhA intron	SSC	intron	26	insertion	insertion	insertion	deletion
	86	ndhA intron	SSC	intron	26	insertion	insertion	insertion	deletion
	87	ndhH-rps15	SSC	spacer	14	deletion	deletion	deletion	insertion
	88	ndhH-rps15	SSC	spacer	18	deletion	deletion	deletion	insertion
	89	rps15-trnN	SSC	spacer	5	deletion	deletion	deletion	insertion
	90	rps15-trnN	SSC	spacer	6	deletion	deletion	deletion	insertion
	91	trnI intron	SSC	intron	3	insertion	insertion	insertion	deletion
	92	trnV-rps12	IR	spacer	21	insertion	insertion	insertion	deletion
	93	trnI-trnL	IR	spacer	5	insertion	insertion	insertion	deletion
	94	trnI-trnL	IR	spacer	5	deletion	deletion	deletion	insertion
